# Supplementary material for: Early-Life Air Pollution Exposure, Neighborhood Poverty, and Childhood Asthma in the United States, 1990–2014
Source: PubMed Central journal article supplement (PMC6025399; doi:10.3390/ijerph15061114), 2018-05-30
Supplement: ijerph-15-01114-s001.pdf [file ijerph-15-01114-s001.pdf]

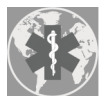

**Supplementary Materials**

**Table S1.**

**Table S1. Association of early-life NO<sub>2</sub> exposure\* with childhood asthma risk, PSID-CDS, 1990-2014 (n=4535)**

|                                     | Model 1         |             | Model 2                |             | Model 3                      |             |
|-------------------------------------|-----------------|-------------|------------------------|-------------|------------------------------|-------------|
|                                     | NO <sub>2</sub> |             | NO <sub>2</sub> + Demo |             | NO <sub>2</sub> + Demo + Hlt |             |
|                                     | OR              | 95% CI      | OR                     | 95% CI      | OR                           | 95% CI      |
| Early-life NO <sub>2</sub> exposure | <b>1.18</b>     | (1.09-1.27) | <b>1.21</b>            | (1.20-1.33) | <b>1.19</b>                  | (1.08-1.31) |
| Child-level:                        |                 |             |                        |             |                              |             |
| Age (years)                         |                 |             | 1.02                   | (0.99-1.04) | 1.02                         | (0.99-1.04) |
| Sex                                 |                 |             |                        |             |                              |             |
| Male (ref)                          |                 |             | 1.00                   |             | 1.00                         |             |
| Female                              |                 |             | <b>0.74</b>            | (0.63-0.88) | <b>0.73</b>                  | (0.62-0.87) |
| Cohort                              |                 |             |                        |             |                              |             |
| 1997 (ref)                          |                 |             | 1.00                   |             | 1.00                         |             |
| 2014                                |                 |             | <b>1.89</b>            | (1.44-2.49) | <b>1.88</b>                  | (1.42-2.48) |
| Parental asthma history             |                 |             |                        |             |                              |             |
| No (ref)                            |                 |             |                        |             | 1.00                         |             |
| Yes                                 |                 |             |                        |             | <b>2.50</b>                  | (2.03-3.07) |
| Household-level:                    |                 |             |                        |             |                              |             |
| HH age (years)                      |                 |             | 0.99                   | (0.99-1.00) | 1.00                         | (0.99-1.01) |
| HH sex                              |                 |             |                        |             |                              |             |
| Male (ref)                          |                 |             | 1.00                   |             | 1.00                         |             |
| Female                              |                 |             | <b>1.33</b>            | (1.04-1.70) | <b>1.33</b>                  | (1.03-1.70) |
| HH race                             |                 |             |                        |             |                              |             |
| NL White (ref)                      |                 |             | 1.00                   |             | 1.00                         |             |
| NL Black                            |                 |             | <b>1.70</b>            | (1.36-2.11) | <b>1.72</b>                  | (1.38-2.13) |
| NL Asian                            |                 |             | 1.15                   | (0.34-3.95) | 1.29                         | (0.34-4.90) |
| NL Other/Multi                      |                 |             | 0.70                   | (0.17-2.86) | 0.71                         | (0.21-2.40) |
| Latino                              |                 |             | 0.97                   | (0.62-1.53) | 1.15                         | (0.73-1.81) |
| HH employment                       |                 |             |                        |             |                              |             |
| Unemployed (ref)                    |                 |             | 1.00                   |             | 1.00                         |             |
| Employed                            |                 |             | 0.91                   | (0.69-1.20) | 0.99                         | (0.74-1.32) |
| Income (year 2000 \$)               |                 |             | 1.00                   | (1.00-1.00) | 1.00                         | (1.00-1.00) |
| Persons per room                    |                 |             | <b>0.76</b>            | (0.58-0.99) | 0.79                         | (0.60-1.04) |
| Current smoking                     |                 |             |                        |             |                              |             |
| No (ref)                            |                 |             |                        |             | 1.00                         |             |
| Yes                                 |                 |             |                        |             | 1.13                         | (0.91-1.39) |
| Health insurance                    |                 |             |                        |             |                              |             |
| Insured (ref)                       |                 |             |                        |             | 1.00                         |             |
| Uninsured                           |                 |             |                        |             | <b>0.47</b>                  | (0.27-0.81) |

HH = Household head

NL = Non-Latino

\*Note: effect estimates are for a one standard deviation (SD) increase in NO<sub>2</sub> (6.59 ppb); estimates in bold are statistically significant at p<0.05

Table S2.

Table S2. Association of early-life PM<sub>2.5</sub> exposure\* with childhood asthma risk, PSID-CDS, 1990-2014 (n=4535)

|                                       | Model 1         |             | Model 2                |             | Model 3                      |             |
|---------------------------------------|-----------------|-------------|------------------------|-------------|------------------------------|-------------|
|                                       | NO <sub>2</sub> |             | NO <sub>2</sub> + Demo |             | NO <sub>2</sub> + Demo + Hlt |             |
|                                       | OR              | 95% CI      | OR                     | 95% CI      | OR                           | 95% CI      |
| Early-life PM <sub>2.5</sub> exposure | <b>1.15</b>     | (1.06-1.25) | <b>1.20</b>            | (1.06-1.35) | <b>1.18</b>                  | (1.05-1.33) |
| Child-level:                          |                 |             |                        |             |                              |             |
| Age (years)                           |                 |             | 1.01                   | (0.99-1.04) | 1.01                         | (0.98-1.04) |
| Sex                                   |                 |             |                        |             |                              |             |
| Male (ref)                            |                 |             | 1.00                   |             | 1.00                         |             |
| Female                                |                 |             | <b>0.75</b>            | (0.63-0.88) | <b>0.74</b>                  | (0.62-0.88) |
| Cohort                                |                 |             |                        |             |                              |             |
| 1997 (ref)                            |                 |             | 1.00                   |             | 1.00                         |             |
| 2014                                  |                 |             | <b>1.99</b>            | (1.46-2.71) | <b>1.97</b>                  | (1.44-2.69) |
| Parental asthma history               |                 |             |                        |             |                              |             |
| No (ref)                              |                 |             |                        |             | 1.00                         |             |
| Yes                                   |                 |             |                        |             | <b>2.53</b>                  | (2.06-3.10) |
| Household-level:                      |                 |             |                        |             |                              |             |
| HH age (years)                        |                 |             | 1.00                   | (0.98-1.01) | 1.00                         | (0.99-1.01) |
| HH sex                                |                 |             |                        |             |                              |             |
| Male (ref)                            |                 |             | 1.00                   |             | 1.00                         |             |
| Female                                |                 |             | <b>1.32</b>            | (1.03-1.69) | <b>1.31</b>                  | (1.02-1.69) |
| HH race                               |                 |             |                        |             |                              |             |
| NL White (ref)                        |                 |             | 1.00                   |             | 1.00                         |             |
| NL Black                              |                 |             | <b>1.65</b>            | (1.32-2.06) | <b>1.68</b>                  | (1.34-2.09) |
| NL Asian                              |                 |             | 1.24                   | (0.33-4.62) | 1.37                         | (0.34-5.55) |
| NL Other/Multi                        |                 |             | 0.75                   | (0.18-3.15) | 0.77                         | (0.22-2.67) |
| Latino                                |                 |             | 1.01                   | (0.64-1.59) | 1.19                         | (0.76-1.87) |
| HH employment                         |                 |             |                        |             |                              |             |
| Unemployed (ref)                      |                 |             | 1.00                   |             | 1.00                         |             |
| Employed                              |                 |             | 0.90                   | (0.69-1.19) | 0.99                         | (0.74-1.31) |
| Income (year 2000 \$)                 |                 |             | 1.00                   | (1.00-1.00) | 1.00                         | (1.00-1.00) |
| Persons per room                      |                 |             | 0.77                   | (0.59-1.00) | 0.80                         | (0.61-1.05) |
| Current smoking                       |                 |             |                        |             |                              |             |
| No (ref)                              |                 |             |                        |             | 1.00                         |             |
| Yes                                   |                 |             |                        |             | 1.11                         | (0.90-1.37) |
| Health insurance                      |                 |             |                        |             |                              |             |
| Insured (ref)                         |                 |             |                        |             | 1.00                         |             |
| Uninsured                             |                 |             |                        |             | <b>0.47</b>                  | (0.27-0.82) |

HH = Household head

NL = Non-Latino

\*Note: effect estimates are for a one standard deviation (SD) increase in PM<sub>2.5</sub> (3.31 µ/m<sup>3</sup>); estimates in bold are statistically significant at p<0.05

**Table S3.****Table S3. Association of early-life pollution exposure\* with childhood asthma risk by neighborhood (NH) poverty, PSID-CDS, 1990-2014**

|                                       | <10% NH Poverty |             | 10%-20% NH Poverty |             | > 20% NH Poverty |             |
|---------------------------------------|-----------------|-------------|--------------------|-------------|------------------|-------------|
|                                       | (n=1634)        |             | (n=1391)           |             | (n=1465)         |             |
|                                       | OR              | 95% CI      | OR                 | 95% CI      | OR               | 95% CI      |
| Early-life NO <sub>2</sub> exposure   | 1.16            | (0.94-1.42) | <b>1.20</b>        | (1.02-1.42) | <b>1.24</b>      | (1.06-1.44) |
| Early-life PM <sub>2.5</sub> exposure | 1.15            | (0.92-1.43) | 1.18               | (0.94-1.47) | <b>1.25</b>      | (1.02-1.54) |

\*Note: effect estimates are for the standard deviation (SD) increase in each pollutant (6.59 ppb for NO<sub>2</sub> and 3.31 µ/m<sup>3</sup> for PM<sub>2.5</sub>); estimates in bold are statistically significant at p<0.05

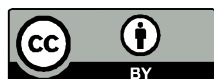

© 2018 by the authors. Licensee MDPI, Basel, Switzerland. This article is an open access article distributed under the terms and conditions of the Creative Commons Attribution (CC BY) license (<http://creativecommons.org/licenses/by/4.0/>).
